# Supplementary material
Source: PubMed Central journal article supplement (PMC3073448)
Supplement: NIHMS266890-supplement-Supp_Fig_S1-_S3.pdf [file NIHMS266890-supplement-Supp_Fig_S1-_S3.pdf]

## Supporting Information

### Supplemental Figure Legends

**Figure S1.** *The effects of LRAT on the in vitro activity assay of human RPE65 and 13cIMH.* Plasmid transfection of human RPE65 and 13cIMH into 293A-LRAT [1] and 293A cells, Western blot analysis and *in vitro* enzyme activity assays using atRE-incorporated liposomes were performed as described in Materials and Methods. Following the normalization by the RPE65 or 13cIMH expression levels (**a**), the human RPE65 in 293A cells (no-LRAT) generated both of the 11-*cis* and 13-*cis* retinol peaks (**b**). In contrast, activity of human RPE65 in 293A-LRAT cells exhibited a higher 11cROL peak but no 13cROL peak (**c**). On the other hand 13cIMH in 293A cells showed a significantly higher peak (**d**) of 13cROL than that of 293A-LRAT cells, but no 11cROL (**e**). It is likely that the generated 13cROL is used as the LRAT substrate and is esterified back to retinyl ester. As 11cROL was not an efficient substrate [2] and CRALBP can not stabilize 13cROL, LRAT selectively esterifies less 11cROL. Peak 1; atRE, 2; 11cROL, 3; 13cROL, 4; atROL.

**Figure S2.** *Immunohistochemistry of the cross section at the optic tectum of zebrafish brain.* (1) The diagram shows zebrafish brain (modified from Castro, A. et al. [3]) and a line indicates the cutting line. Tel; Telencephalon, OT; Optic Tectum CB; Cerebellum. (2) A phase contrast image of a cross section of zebrafish brain. (3, 4) The brain section was incubated without the monoclonal antibody for 13cIMH (Negative control, 3; FITC channel, 4; DAPI). (5-7) The brain section was incubated with the monoclonal antibody for 13cIMH. Green fluorescence signals, indicated by red arrows, for 13cIMH (5; 13cIMH, 6; DAPI, 7; merged) were detected in the pre-ventricular grey zone (PGZ) of optic tectum (OT). Scale bar = 200  $\mu$ m.

**Figure S3.** *Specificity of the anti-RPE65 antibodies to recombinant zebrafish 13cIMH.* (a) The expression plasmids were transfected into 293A cells and cultured for 48 hours. The cells were harvested, equal amounts (20  $\mu$ g) of total cellular protein were resolved by SDS-PAGE, and the protein expression was confirmed by Western blot analysis with a polyclonal anti-human RPE65 [4], mouse monoclonal anti-His-tag, and goat polyclonal anti- $\beta$ -actin antibodies at same time. **Pc**, positive control (bovine RPE microsomal protein); **Nc** negative control (cells expressing RFP); **Hum**, human RPE65; **zRPE65**, zebrafish RPE65 without 6xHis-tag; **13cIMH**, zebrafish 13cIMH without 6xHis-tag; **zRPE65-His**, zebrafish RPE65 with 6xHis-tag; **13cIMH-His**, zebrafish 13cIMH with 6xHis-tag. Subcellular fractionation was performed as explained in Materials and Methods. The polyclonal antibody recognized zebrafish 13cIMH but not zebrafish RPE65. (b) The cells expressing 13cIMH were fractionated. The same amounts of protein from each fraction (5  $\mu$ g) were blotted with a monoclonal anti-human RPE65 antibody (Millipore, Billerica, MA) and a rabbit polyclonal antibody to calnexin (ER membrane marker, Abcam, Cambridge, MA). The monoclonal antibody recognized zebrafish 13cIMH but not zebrafish RPE65 (zRPE65). **T**; total cell lysates, **C**; cytosolic, **M**; membrane, **N**; nuclear fractions and **S**; detergent-insoluble fraction including cytoskeleton and inclusion body.

## References

1. Takahashi Y, Moiseyev G, Chen Y & Ma JX (2005) Identification of conserved histidines and glutamic acid as key residues for isomerohydrolase activity of RPE65, an enzyme of the visual cycle in the retinal pigment epithelium. *FEBS Lett* **579**, 5414-5418.
2. Bok D, Ruiz A, Yaron O, Jahng WJ, Ray A, Xue L & Rando RR (2003) Purification and characterization of a transmembrane domain-deleted form of lecithin retinol acyltransferase. *Biochemistry* **42**, 6090-6098.
3. Castro A, Becerra M, Manso MJ & Anadon R (2006) Calretinin immunoreactivity in the brain of the zebrafish, *Danio rerio*: distribution and comparison with some neuropeptides and neurotransmitter-synthesizing enzymes. II. Midbrain, hindbrain, and rostral spinal cord. *J Comp Neurol* **494**, 792-814.
4. Ma J, Zhang J, Othersen KL, Moiseyev G, Ablonczy Z, Redmond TM, Chen Y & Crouch RK (2001) Expression, purification, and MALDI analysis of RPE65. *Invest Ophthalmol Vis Sci* **42**, 1429-1435.

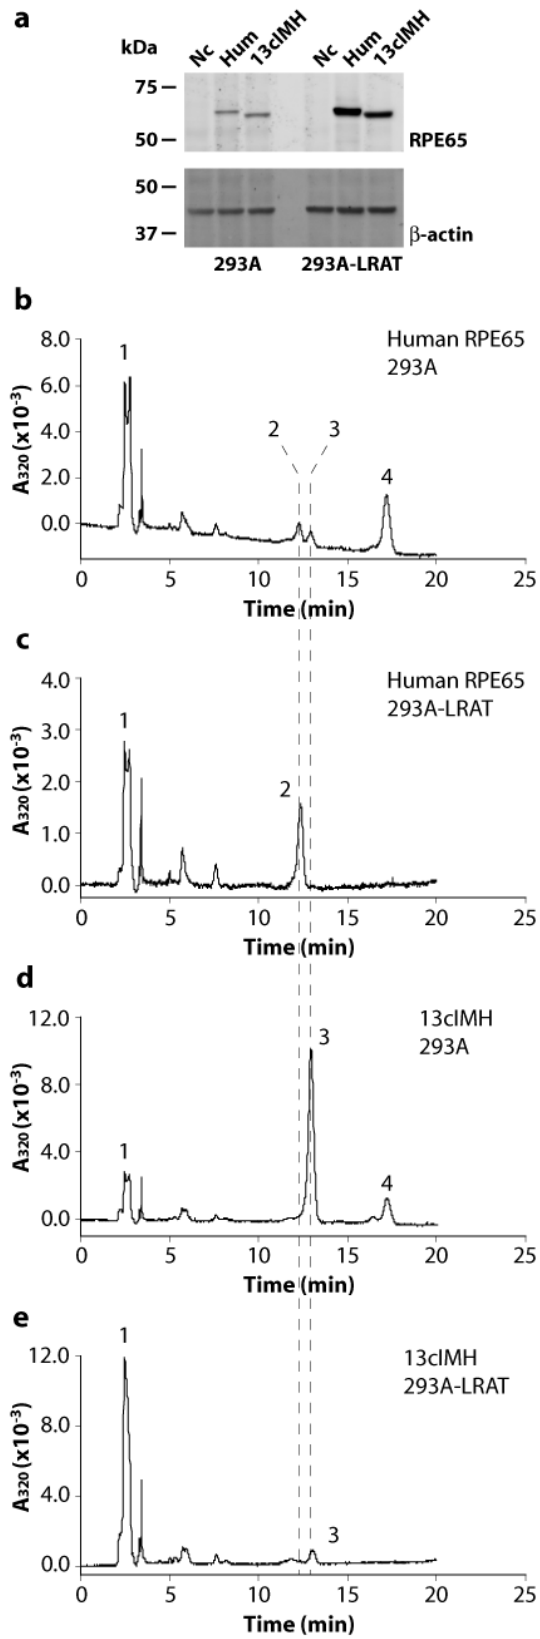

Fig. S1 Y.Takahashi et al

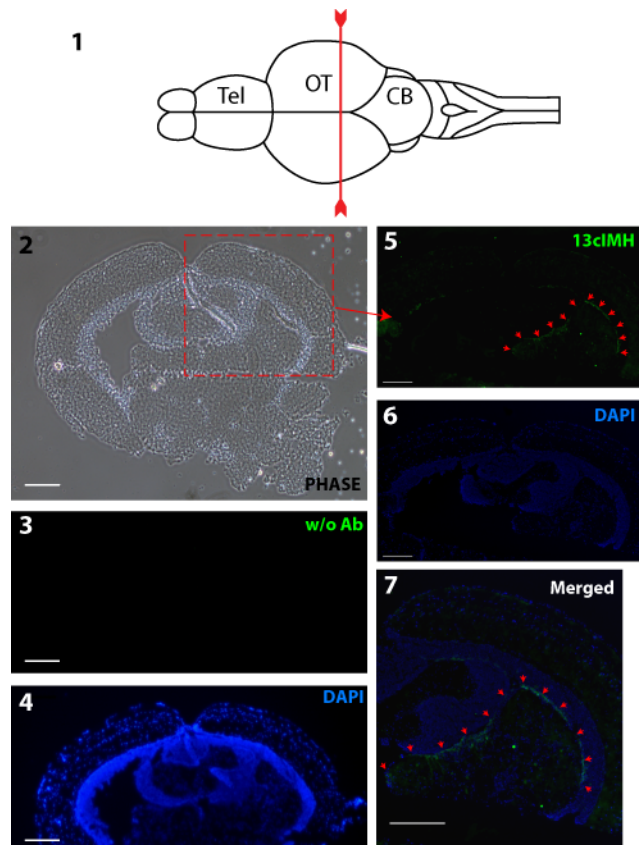

Fig.S2 Y.Takahashi et al

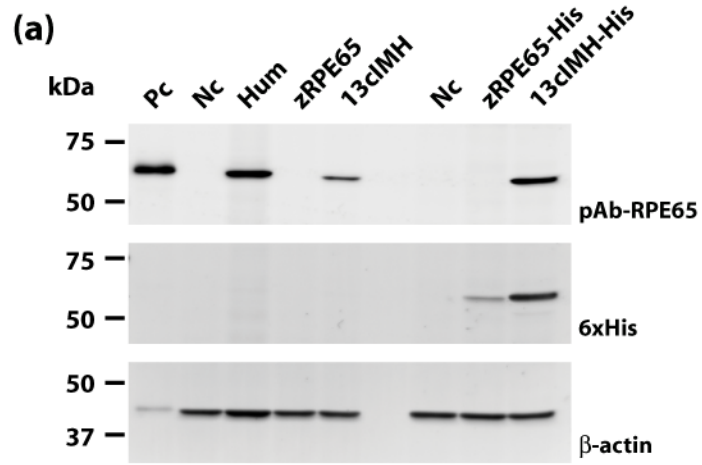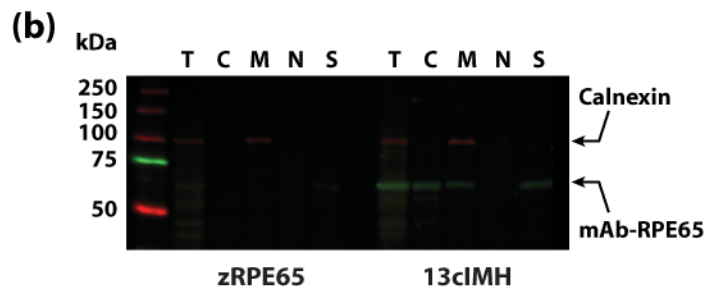

Fig.S3 Y.Takahashi et al
